# Supplementary material for: Obesity during Pregnancy in the Horse: Effect on Term Placental Structure and Gene Expression, as Well as Colostrum and Milk Fatty Acid Concentration
Source: MDPI journal article supplement (doi:10.3390/vetsci10120691), 2023-12-04
Supplement: s1 [file s1]

**Table S1: Feto-placental biometry results**

Results are expressed as median [Q1-Q3]. P-values were calculated using a permutation Anova (package lmerPerm, function aovp, R software) considering maternal age and maternal withers' height as co-variables.

| Variable                             | N group (n=10)   | O group (n=14)   | p-value |
|--------------------------------------|------------------|------------------|---------|
| Placental weight (kg)                | 3.47 [2.82-3.54] | 3.36 [2.78-3.78] | 0.706   |
| Placental volume (L)                 | 2.73 [2.54-3.27] | 2.93 [2.37-3.12] | 0.784   |
| Placental surface (cm <sup>2</sup> ) | 8933 [8529-9246] | 8808 [8230-9603] | 1.000   |
| Foal birthweight (kg)                | 56.3 [52.3-59.4] | 54.5 [52.1-57.9] | 0.921   |
| Placental efficiency                 | 16.9 [16.6-18.4] | 17.3 [15.2-18.9] | 0.573   |

**Table S2: Placental stereology**

Results are expressed as median [Q1-Q3]. P-values were calculated using a permutation Anova (package lmerPerm, function aovp, R software) considering maternal age and maternal withers' height as co-variables. P-values were corrected for multiple testing using the fdr method.

| Variable                                                                           | N group (n=9)           | O group (n=13)            | p-value | Adjusted p-value |
|------------------------------------------------------------------------------------|-------------------------|---------------------------|---------|------------------|
| Volume of allantoic connective tissue (cm <sup>3</sup> )                           | 1597.5<br>[1338-2082.8] | 1595.2<br>[1187.4-1820.3] | 0.430   | 0.739            |
| Volume of allantoic vessels (cm <sup>3</sup> )                                     | 313.7<br>[290.8-354.3]  | 206.1<br>[161.9-337.8]    | 0.057   | 0.316            |
| Volume of histotrophic trophoblast (cm <sup>3</sup> )                              | 92.5<br>[56-126.1]      | 93.4<br>[82.7-115.1]      | 0.452   | 0.739            |
| Volume of haemotrophic trophoblast (cm <sup>3</sup> )                              | 254.2<br>[162.5-295.2]  | 337.1<br>[233-369.4]      | 0.060   | 0.316            |
| Volume of microcotyledonary connective tissue (cm <sup>3</sup> )                   | 206.9<br>[180.6-242.0]  | 218.5<br>[188.9-295.0]    | 0.556   | 0.739            |
| Volume of microcotyledonary vessels (cm <sup>3</sup> )                             | 245<br>[188.3-273.8]    | 318.7<br>[249.9-382.4]    | 0.248   | 0.578            |
| Volume of microcotyledons (cm <sup>3</sup> )                                       | 663.6<br>[562.2-788.3]  | 867.0<br>[688.3-1052.4]   | 0.247   | 0.578            |
| Surface of allantoic connective tissue (cm <sup>2</sup> .10 <sup>5</sup> )         | 1.3<br>[1.2-1.4]        | 1.2<br>[0.8-1.4]          | 0.099   | 0.347            |
| Surface of allantoic vessels (cm <sup>2</sup> .10 <sup>5</sup> )                   | 1.2<br>[1-1.3]          | 0.9<br>[0.6-1.2]          | 0.068   | 0.316            |
| Surface of histotrophic trophoblast (cm <sup>2</sup> .10 <sup>5</sup> )            | 0.7<br>[0.5-0.9]        | 0.7<br>[0.5-0.8]          | 0.615   | 0.739            |
| Surface of haemotrophic trophoblast (cm <sup>2</sup> .10 <sup>5</sup> )            | 4.4<br>[3.8-4.9]        | 5.3<br>[3.8-6.6]          | 0.541   | 0.739            |
| Surface of microcotyledonary connective tissue (cm <sup>2</sup> .10 <sup>5</sup> ) | 3.4<br>[3.2-4]          | 3.8<br>[2.8-4.3]          | 0.804   | 0.804            |
| Surface of microcotyledonary vessels (cm <sup>2</sup> .10 <sup>5</sup> )           | 4.6<br>[4-6.2]          | 5<br>[4.4-6.9]            | 0.686   | 0.739            |
| Surface of microcotyledons (cm <sup>2</sup> .10 <sup>5</sup> )                     | 11.8<br>[11.1-15.1]     | 15.6<br>[11-17.6]         | 0.667   | 0.739            |

**Table S3: Placental gene expression**

Results are expressed as median [Q1-Q3]. P-values were calculated using a permutation Anova (package lmerPerm, function aovp, R software) considering maternal age and maternal withers' height as co-variables. P-values were corrected for multiple testing using the fdr method.

| Gene         | N group (n=9)    | O group (n=13)   | p-value | Adjusted p-value |
|--------------|------------------|------------------|---------|------------------|
| <i>ENG</i>   | 1.30 [1.02-1.60] | 1.16 [1.04-1.51] | 0.765   | 0.784            |
| <i>FLT1</i>  | 1.39 [1.09-1.43] | 1.16 [0.92-1.29] | 0.745   | 0.784            |
| <i>KDR</i>   | 1.19 [0.97-1.44] | 1.08 [0.88-1.36] | 0.510   | 0.784            |
| <i>GLUT1</i> | 1.08 [1.03-1.26] | 1.21 [0.83-1.35] | 0.784   | 0.784            |
| <i>GLUT3</i> | 0.87 [0.80-0.97] | 0.86 [0.75-1.07] | 0.092   | 0.784            |
| <i>SNAT2</i> | 1.28 [1.08-1.35] | 1.09 [0.95-1.35] | 0.573   | 0.784            |
| <i>CD36</i>  | 1.21 [1.11-1.43] | 1.33 [0.78-1.57] | 0.655   | 0.784            |
| <i>LPL</i>   | 0.66 [0.53-1.02] | 0.97 [0.68-1.16] | 0.571   | 0.784            |
| <i>H19</i>   | 0.86 [0.61-1.19] | 0.75 [0.56-1.05] | 0.592   | 0.784            |
| <i>IGF2</i>  | 1.02 [0.78-1.36] | 0.71 [0.63-0.96] | 0.149   | 0.784            |
| <i>IGF1R</i> | 0.91 [0.75-1.19] | 0.74 [0.61-0.87] | 0.448   | 0.784            |

*GADPH*: Glyceraldehyde 3-phosphate dehydrogenase (reference gene), *SCAMP3*: (Secretory Carrier Membrane Protein 3 (reference gene), *RPL32*: Ribosomal Protein L32 (reference gene), *ENG*: Endoglin (TGF- $\beta$  receptor, involved in angiogenesis), *Flt1*: Fms Related Receptor Tyrosine Kinase 1 (VEGF receptor, involved in vasculogenesis and angiogenesis), *KDR*: Kinase insert Domain Receptor (VEGF receptor, involved in vasculogenesis and angiogenesis), *SLC2A1*: solute carrier family 2 member 1 (*GLUT1*, glucose transporter), *SLC2A3*: solute carrier family 2 member 3 (*GLUT3*, glucose transporter), *SLC38A2*: solute carrier family 38 member 2 (*SNAT2*, neutral amino acid transporter), *CD36*: Cluster of differentiation 36 (fatty acid transporter), *LPL*: Lipoprotein Lipase (hydrolyses triglycerides into fatty acids), *H19*: H19 Imprinted Maternally Expressed Transcript (lncRNA, inhibits growth), *IGF-2*: Insulin-like Growth Factor 2 (growth factor), *IGF-1R*: Insulin-like growth factor 1 receptor (*IGF2* receptor, transduces *IGF2* signal).

**Table S4: Total fatty acid concentration**

Results are expressed as median [Q1-Q3]. P-values were calculated using a permutation Anova (package lmerPerm, function aovp, R software) considering maternal age as covariate. P-values were corrected for multiple testing using the fdr method.

| Sample                               | Time    | N group (n=10)            | O group (n=14)            | p-value | Adjusted p-value |
|--------------------------------------|---------|---------------------------|---------------------------|---------|------------------|
| Plasma of mares ( $\mu\text{g/mL}$ ) | Birth   | 1019.9<br>[1339.8-1541.9] | 939.1<br>[1156-1341.8]    | 1.000   | 1.000            |
|                                      | 30 days | 497.9<br>[518.4-571.7]    | 478.2<br>[541.7-612.7]    | 0.902   | 1.000            |
|                                      | 90 days | 486.8<br>[523.8-567.8]    | 511.7<br>[584.4-645.3]    | 0.178   | 0.329            |
| Milk ( $\mu\text{g/mL}$ )            | Birth   | 3265.7<br>[4108.3-4491.3] | 2209.3<br>[3065.8-5242.9] | 0.764   | 1.000            |
|                                      | 30 days | 1200.4<br>[1375.4-2533.2] | 1139.3<br>[1266.8-1548.4] | 0.177   | 0.329            |
|                                      | 90 days | 714.3<br>[929.1-1059.7]   | 666.3<br>[697.1-856.8]    | 0.183   | 0.329            |
| Plasma of foals ( $\mu\text{g/mL}$ ) | Birth   | 556.4<br>[777.6-1036.5]   | 556.1<br>[639.3-694]      | 0.073   | 0.329            |
|                                      | 30 days | 710.9<br>[926.4-1004.6]   | 830.7<br>[895.9-959.2]    | 0.804   | 1.000            |
|                                      | 90 days | 723.3<br>[763.1-778.1]    | 801.8<br>[875.2-904.8]    | 0.165   | 1.000            |

**Table S5: Fatty acid composition in plasma of mares during lactation (in % of total fatty acids)**

Results are expressed as median [Q1-Q3]. P-values were calculated using a permutation Anova (package lmer, function aovp, R software) considering maternal age as covariate. P-values were corrected for multiple testing using the fdr method. SFA: saturated fatty acids, MC-SFA: medium-chain saturated fatty acids, LC-SFA: long-chain saturated fatty acids, MUFA: monounsaturated fatty acids, MC-MUFA: medium-chain monounsaturated fatty acids, LC-MUFA: long-chain monounsaturated fatty acids, PUFA: polyunsaturated fatty acids.

**A. At foaling**

| Fatty acid (% of total fatty acids) | N group (n=10)      | O group (n=14)      | p-value | Adjusted p-value |
|-------------------------------------|---------------------|---------------------|---------|------------------|
| C10:0                               | 0.35 [0.24-0.40]    | 0.33 [0.21-0.43]    | 0.686   | 0.959            |
| C12:0                               | 0.51 [0.49-0.71]    | 0.49 [0.34-0.77]    | 1.000   | 1.000            |
| C14:0                               | 1.67 [1.36-1.96]    | 1.73 [1.58-1.98]    | 0.686   | 0.959            |
| C15:0                               | 0.28 [0.24-0.33]    | 0.32 [0.30-0.33]    | 0.686   | 0.959            |
| C16:0                               | 20.86 [19.49-22.57] | 22.41 [21.42-22.9]  | 0.843   | 0.959            |
| C18:0                               | 13.35 [12.02-14.23] | 12.17 [11.83-12.94] | 0.804   | 0.959            |
| C10:1                               | 0.51 [0.41-0.67]    | 0.40 [0.31-0.82]    | 0.784   | 0.959            |
| C16:1 $\omega$ 7                    | 3.13 [2.39-3.34]    | 3.33 [3.10-3.47]    | 0.342   | 0.959            |
| C18:1 $\omega$ 7                    | 1.23 [1.16-1.46]    | 1.54 [1.44-1.66]    | 0.275   | 0.959            |
| C12:1                               | 0.15 [0.11-0.18]    | 0.13 [0.11-0.15]    | 0.516   | 0.959            |
| C14:1 $\omega$ 5                    | 0.30 [0.22-0.33]    | 0.30 [0.26-0.37]    | 0.233   | 0.959            |
| C15:1 $\omega$ 9                    | 0.36 [0.29-0.39]    | 0.38 [0.28-0.52]    | 0.108   | 0.722            |
| C16:1 $\omega$ 9                    | 0.78 [0.59-0.97]    | 0.82 [0.74-0.90]    | 0.843   | 0.959            |
| C18:1 $\omega$ 9                    | 9.62 [8.25-10.67]   | 9.72 [8.89-10.72]   | 0.008   | 0.156            |
| C20:1 $\omega$ 9                    | 0.18 [0.15-0.20]    | 0.22 [0.2-0.22]     | 0.474   | 0.959            |
| C18:3 $\omega$ 3                    | 3.94 [3.25-4.36]    | 4.11 [3.75-4.91]    | 0.863   | 0.959            |
| C20:3 $\omega$ 3                    | 0.05 [0.04-0.06]    | 0.06 [0.03-0.08]    | 0.058   | 0.580            |
| C20:5 $\omega$ 3                    | 1.10 [0.91-1.25]    | 0.99 [0.66-1.22]    | 0.725   | 0.959            |
| C18:2 $\omega$ 6                    | 39.03 [36.86-43.07] | 39.00 [37.28-39.94] | 0.592   | 0.959            |
| C20:4 $\omega$ 6                    | 0.51 [0.40-0.54]    | 0.45 [0.37-0.50]    | 0.922   | 0.970            |
| SFA                                 | 36.85 [35.76-38.50] | 37.69 [36.59-38.2]  | 0.706   | 0.920            |
| MUFA                                | 16.14 [14.09-17.60] | 16.54 [15.62-17.74] | 0.505   | 0.920            |
| PUFA                                | 45.09 [42.93-48.09] | 44.88 [43.06-45.93] | 0.784   | 0.920            |
| MC-SFA                              | 2.79 [2.44-3.73]    | 3.08 [2.65-3.41]    | 0.725   | 0.920            |
| LC-SFA (>C16)                       | 33.42 [32.82-35.60] | 34.66 [33.77-35.42] | 0.706   | 0.920            |
| MC-MUFA                             | 1.29 [1.16-1.49]    | 1.20 [1.01-1.84]    | 0.804   | 0.920            |
| LC-MUFA (>C16)                      | 14.64 [12.52-16.61] | 15.31 [13.61-16.62] | 0.784   | 0.920            |
| $\omega$ 3 PUFA                     | 4.96 [4.51-5.28]    | 5.11 [4.65-6.00]    | 0.961   | 0.961            |
| $\omega$ 6 PUFA                     | 39.55 [37.22-43.61] | 39.41 [37.83-40.39] | 0.470   | 0.920            |
| $\omega$ 3/ $\omega$ 6 PUFA ratio   | 0.12 [0.11-0.15]    | 0.13 [0.11-0.16]    | 0.804   | 0.920            |

**B. At 30 days of lactation**

| Fatty acid (%)   | N group (n=10)      | O group (n=14)      | p-value | Adjusted p-value |
|------------------|---------------------|---------------------|---------|------------------|
| C10:0            | 0.42 [0.36-0.48]    | 0.31 [0.27-0.49]    | 0.481   | 0.741            |
| C12:0            | 0.64 [0.54-0.81]    | 0.52 [0.44-0.55]    | 0.330   | 0.671            |
| C14:0            | 1.66 [1.43-1.99]    | 1.59 [1.47-1.67]    | 0.192   | 0.671            |
| C15:0            | 0.36 [0.32-0.42]    | 0.36 [0.31-0.40]    | 0.941   | 0.941            |
| C16:0            | 25.80 [25.28-28.49] | 24.15 [23.4-25.26]  | 0.012   | 0.248            |
| C18:0            | 14.20 [13.52-14.33] | 14.11 [13.25-15.19] | 0.355   | 0.671            |
| C10:1            | 0.64 [0.53-0.81]    | 0.76 [0.56-0.84]    | 0.745   | 0.877            |
| C16:1 $\omega$ 7 | 2.61 [2.55-2.82]    | 3.14 [2.73-3.83]    | 0.235   | 0.671            |
| C18:1 $\omega$ 7 | 1.44 [1.27-1.73]    | 1.66 [1.4-1.76]     | 0.126   | 0.631            |
| C12:1            | 0.21 [0.20-0.24]    | 0.21 [0.16-0.27]    | 0.804   | 0.893            |
| C14:1 $\omega$ 5 | 0.29 [0.28-0.32]    | 0.31 [0.27-0.37]    | 0.706   | 0.877            |
| C15:1 $\omega$ 9 | 0.53 [0.47-0.58]    | 0.50 [0.39-0.58]    | 0.241   | 0.671            |
| C16:1 $\omega$ 9 | 0.44 [0.41-0.47]    | 0.42 [0.37-0.54]    | 0.394   | 0.671            |

|                        |                     |                     |       |       |
|------------------------|---------------------|---------------------|-------|-------|
| C18:1 $\omega$ 9       | 11.57 [10.70-11.89] | 12.52 [11.96-13.62] | 0.03  | 0.304 |
| C20:1 $\omega$ 9       | 0.25 [0.24-0.26]    | 0.21 [0.19-0.29]    | 0.126 | 0.631 |
| C18:3 $\omega$ 3       | 4.57 [4.11-5.37]    | 4.09 [3.88-4.77]    | 0.603 | 0.808 |
| C20:3 $\omega$ 3       | 0.09 [0.07-0.10]    | 0.09 [0.08-0.12]    | 0.606 | 0.808 |
| C20:5 $\omega$ 3       | 1.00 [0.91-1.19]    | 1.07 [0.87-1.46]    | 0.307 | 0.671 |
| C18:2 $\omega$ 6       | 29.39 [28.02-30.32] | 30.78 [29.34-31.94] | 0.403 | 0.671 |
| C20:4 $\omega$ 6       | 0.34 [0.29-0.37]    | 0.31 [0.28-0.34]    | 0.922 | 0.941 |
| SFA                    | 42.84 [42.08-45.13] | 41.33 [41.03-42.23] | 0.038 | 0.225 |
| MUFA                   | 18.82 [18.45-19.68] | 20.42 [18.75-21.29] | 0.121 | 0.312 |
| PUFA                   | 36.44 [35.26-37.22] | 36.87 [35.53-37.77] | 0.686 | 0.824 |
| MC-SFA (>C16)          | 3.16 [2.97-3.16]    | 2.84 [2.57-3.10]    | 0.188 | 0.322 |
| LC-SFA                 | 40.24 [39.65-42.13] | 38.73 [38.36-39.33] | 0.017 | 0.209 |
| MC-MUFA                | 1.65 [1.57-1.81]    | 1.72 [1.46-2.02]    | 0.66  | 0.824 |
| LC-MUFA (>C16)         | 16.85 [16.61-17.23] | 18.56 [16.79-19.58] | 0.100 | 0.312 |
| $\omega$ 3 PUFA        | 6.15 [5.51-6.84]    | 5.80 [5.36-6.26]    | 0.863 | 0.863 |
| $\omega$ 6 PUFA        | 29.7 [28.38-30.66]  | 31.11 [29.61-32.36] | 0.400 | 0.600 |
| $\omega$ 3/ $\omega$ 6 | 0.20 [0.18-0.23]    | 0.19 [0.17-0.21]    | 0.863 | 0.863 |

### C. At 90 days of lactation

| Fatty acid (%of total fatty acids) | N group (n=10)      | O group (n=14)      | p-value | Adjusted p-value |
|------------------------------------|---------------------|---------------------|---------|------------------|
| C10:0                              | 0.12 [0.07-0.15]    | 0.12 [0.09-0.17]    | 0.784   | 0.923            |
| C12:0                              | 0.32 [0.22-0.37]    | 0.29 [0.24-0.36]    | 0.581   | 0.923            |
| C14:0                              | 0.96 [0.90-1.02]    | 1.05 [0.85-1.22]    | 0.215   | 0.538            |
| C15:0                              | 0.38 [0.37-0.40]    | 0.38 [0.35-0.39]    | 0.660   | 0.923            |
| C16:0                              | 22.85 [21.44-23.97] | 22.26 [21.32-23.35] | 0.863   | 0.959            |
| C18:0                              | 16.64 [15.79-18.01] | 16.38 [15.58-17.15] | 0.564   | 0.923            |
| C10:1                              | 0.5 [0.41-0.58]     | 0.44 [0.35-0.53]    | 0.435   | 0.923            |
| C16:1 $\omega$ 7                   | 2.06 [1.79-2.21]    | 2.51 [2.06-3.16]    | 0.013   | 0.252            |
| C18:1 $\omega$ 7                   | 1.47 [1.44-1.49]    | 1.48 [1.39-1.63]    | 0.205   | 0.538            |
| C12:1                              | 0.24 [0.23-0.25]    | 0.24 [0.20-0.24]    | 0.203   | 0.538            |
| C14:1 $\omega$ 5                   | 0.26 [0.23-0.27]    | 0.28 [0.19-0.32]    | 0.726   | 0.923            |
| C15:1 $\omega$ 9                   | 0.49 [0.46-0.58]    | 0.49 [0.37-0.53]    | 0.172   | 0.538            |
| C16:1 $\omega$ 9                   | 0.43 [0.40-0.44]    | 0.47 [0.41-0.55]    | 0.055   | 0.388            |
| C18:1 $\omega$ 9                   | 12.87 [12.49-14.23] | 12.83 [11.75-13.62] | 0.619   | 0.923            |
| C20:1 $\omega$ 9                   | 0.21 [0.20-0.23]    | 0.18 [0.16-0.20]    | 0.058   | 0.388            |
| C18:3 $\omega$ 3                   | 3.82 [3.58-4.16]    | 3.87 [3.26-4.10]    | 0.961   | 0.980            |
| C20:3 $\omega$ 3                   | 0.07 [0.06-0.08]    | 0.07 [0.06-0.08]    | 0.765   | 0.923            |
| C20:5 $\omega$ 3                   | 0.86 [0.65-1.00]    | 0.87 [0.71-0.91]    | 0.980   | 0.980            |
| C18:2 $\omega$ 6                   | 33.92 [32.59-35.4]  | 34.6 [32.57-35.86]  | 0.706   | 0.923            |
| C20:4 $\omega$ 6                   | 0.43 [0.39-0.49]    | 0.46 [0.41-0.49]    | 0.086   | 0.429            |
| SFA                                | 41.16 [39.73-41.92] | 40.82 [40.01-41.35] | 0.301   | 0.767            |
| MUFA                               | 19.07 [17.89-20.08] | 18.71 [17.49-20.33] | 0.804   | 0.863            |
| PUFA                               | 38.92 [37.5-40.78]  | 39.21 [37.95-40.58] | 0.765   | 0.863            |
| MC-SFA                             | 1.86 [1.52-2.08]    | 1.95 [1.64-1.98]    | 0.643   | 0.863            |
| LC-SFA (>C16)                      | 39.16 [38.23-39.93] | 38.95 [38.34-39.38] | 0.270   | 0.767            |
| MC-MUFA                            | 1.49 [1.34-1.72]    | 1.44 [1.4-1.54]     | 0.319   | 0.767            |
| LC-MUFA ratio (>C16)               | 17.64 [16.72-18.67] | 17.45 [16.11-19.01] | 0.863   | 0.863            |
| $\omega$ 3 PUFA                    | 4.73 [4.51-4.97]    | 4.81 [4.32-5.05]    | 0.843   | 0.863            |
| $\omega$ 6 PUFA                    | 34.25 [33.05-35.89] | 35.05 [32.97-36.34] | 0.623   | 0.863            |
| $\omega$ 3/ $\omega$ 6 PUFA ratio  | 0.14 [0.14-0.16]    | 0.14 [0.12-0.16]    | 0.606   | 0.863            |

**Figure S1: Fatty acid profile in plasma of mares during lactation**

**A. Biplot of principal component analysis representing the first (30.1%) and second dimensions (15.8%) for fatty acid profile at birth. B. Biplot of principal component analysis representing the first (24.21%) and second**

dimensions (21%) for fatty acid profile at 30 days of lactation. C. Biplot of principal component analysis representing the first (30.1%) and second dimensions (15.8%) for fatty acid profile at 90 days of lactation. Variables included in the analysis are represented by the black arrows. Supplementary variables are represented by the blue arrows. Milk samples from Normal mares are represented by the grey points and ellipse while milk samples from Obese mares are represented by the red points and ellipse. Ellipses represented are 95% confidence ellipses around the barycenter. SFA: saturated fatty acids, MC-SFA: medium-chain saturated fatty acids, LC-SFA: long-chain saturated fatty acids, MUFA: monounsaturated fatty acids, MC-MUFA: medium-chain monounsaturated fatty acids, LC-MUFA: long-chain monounsaturated fatty acids, PUFA: polyunsaturated fatty acids, w3= omega-3 fatty acids, w6: omega-6 fatty acids, w3.w6: omega-3/omega-6 fatty acids ratio.

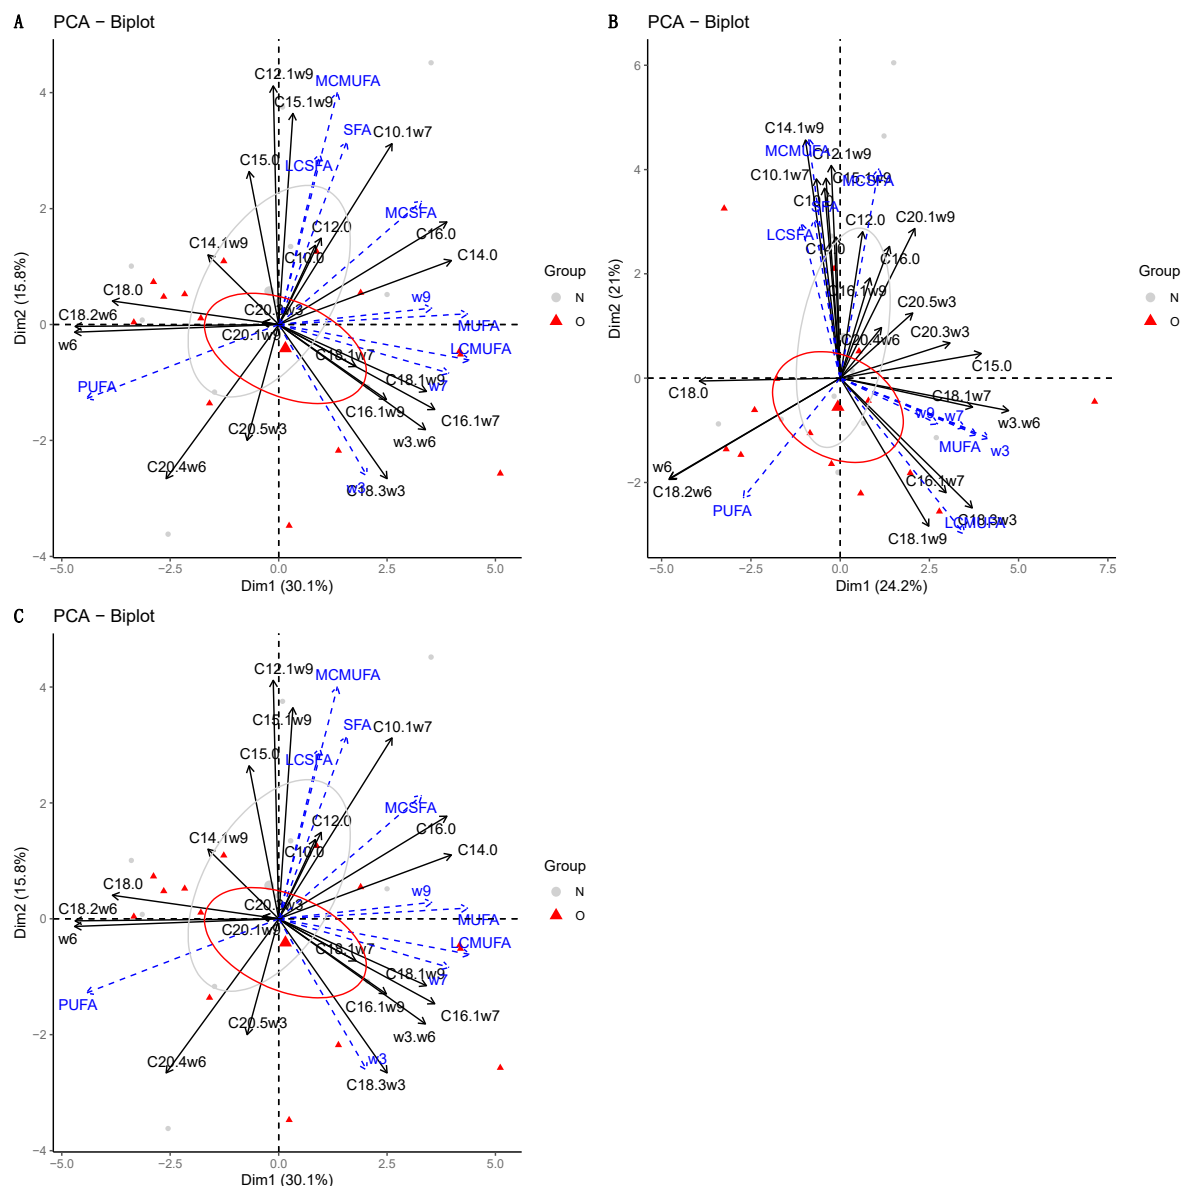

**Table S6: Fatty acid profile in colostrum and milk during lactation**

Results are expressed as median [Q1-Q3]. P-values were calculated using a permutation Anova (package lmer, function aovp, R software) considering maternal age as covariate. P-values were corrected for multiple testing using the *fdr* method. SFA: saturated fatty acids, MC-SFA: medium-chain saturated fatty acids, LC-SFA: long-chain saturated fatty acids, MUFA: monounsaturated fatty acids, MC-MUFA: medium-chain monounsaturated fatty acids, LC-MUFA: long-chain monounsaturated fatty acids, PUFA: polyunsaturated fatty acids.

### A. Colostrum

| Fatty acid (%)                    | N group (n=10)      | O group (n=14)      | p-value | Adjusted p-value |
|-----------------------------------|---------------------|---------------------|---------|------------------|
| C10:0                             | 3.49 [1.05-5.84]    | 0.19 [0.05-0.48]    | 0.000   | 0.000            |
| C12:0                             | 6.29 [2.49-9.27]    | 1.75 [1.00-3.45]    | 0.003   | 0.013            |
| C14:0                             | 7.06 [6.13-8.47]    | 6.46 [5.41-7.79]    | 0.181   | 0.292            |
| C15:0                             | 0.51 [0.50-0.57]    | 0.53 [0.49-0.58]    | 0.462   | 0.606            |
| C16:0                             | 29.67 [27.85-33.66] | 32.45 [31.79-33.52] | 0.029   | 0.066            |
| C18:0                             | 2.09 [1.99-2.24]    | 2.03 [1.89-2.29]    | 0.961   | 0.961            |
| C10:1                             | 0.28 [0.15-0.57]    | 0.07 [0.03-0.10]    | 0.000   | 0.000            |
| C16:1 $\omega$ 7                  | 6.85 [6.58-7.35]    | 8.49 [7.77-8.99]    | 0.008   | 0.025            |
| C18:1 $\omega$ 7                  | 1.80 [1.66-1.90]    | 2.25 [2.00-2.38]    | 0.001   | 0.006            |
| C12:1                             | 0.09 [0.06-0.15]    | 0.06 [0.04-0.07]    | 0.004   | 0.014            |
| C14:1 $\omega$ 5                  | 0.33 [0.30-0.40]    | 0.33 [0.28-0.37]    | 0.563   | 0.695            |
| C15:1 $\omega$ 9                  | 0.06 [0.04-0.09]    | 0.04 [0.03-0.07]    | 0.256   | 0.365            |
| C16:1 $\omega$ 9                  | 1.28 [1.20-1.41]    | 1.47 [1.34-1.58]    | 0.015   | 0.039            |
| C18:1 $\omega$ 9                  | 20.64 [17.43-22.48] | 22.96 [21.87-23.71] | 0.032   | 0.066            |
| C20:1 $\omega$ 9                  | 0.41 [0.38-0.50]    | 0.43 [0.35-0.49]    | 0.843   | 0.885            |
| C18:3 $\omega$ 3                  | 8.35 [7.65-8.98]    | 9.00 [8.64-9.99]    | 0.261   | 0.365            |
| C20:3 $\omega$ 3                  | 0.19 [0.17-0.22]    | 0.18 [0.14-0.22]    | 0.667   | 0.778            |
| C20:5 $\omega$ 3                  | 0.10 [0.08-0.16]    | 0.11 [0.06-0.18]    | 0.765   | 0.845            |
| C22:5 $\omega$ 3                  | 0.02 [0.02-0.02]    | 0.03 [0.02-0.03]    | 0.062   | 0.108            |
| C18:2 $\omega$ 6                  | 7.87 [7.72-8.09]    | 9.11 [8.68-9.74]    | 0.003   | 0.013            |
| C20:4 $\omega$ 6                  | 0.03 [0.02-0.03]    | 0.02 [0.01-0.03]    | 0.052   | 0.099            |
| SFA                               | 50.56 [46.60-54.35] | 45.03 [43.50-46.16] | 0.001   | 0.007            |
| MUFA                              | 31.26 [28.95-33.91] | 35.68 [34.83-37.31] | 0.009   | 0.018            |
| PUFA                              | 17.09 [15.51-18.58] | 19.11 [16.89-19.70] | 0.052   | 0.063            |
| MC-SFA                            | 17.92 [10.25-24.74] | 9.37 [6.99-12.10]   | 0.002   | 0.007            |
| LC-SFA (>C16)                     | 31.80 [29.69-35.76] | 34.57 [33.62-35.80] | 0.032   | 0.043            |
| MC-MUFA                           | 0.76 [0.57-1.23]    | 0.51 [0.46-0.61]    | 0.008   | 0.018            |
| LC-MUFA (>C16)                    | 30.89 [27.51-33.86] | 35.40 [34.02-37.03] | 0.012   | 0.021            |
| $\omega$ 3 PUFA                   | 8.75 [7.90-9.33]    | 9.34 [8.86-10.32]   | 0.257   | 0.257            |
| $\omega$ 6 PUFA                   | 7.89 [7.37-8.11]    | 9.14 [8.70-9.74]    | 0.002   | 0.007            |
| $\omega$ 3/ $\omega$ 6 PUFA ratio | 1.09 [1.03-1.32]    | 1.07 [0.96-1.23]    | 0.125   | 0.137            |

### B. At 30 days of lactation

| Fatty acid (%)   | N group (n=10)      | O group (n=14)      | p-value | Adjusted p-value |
|------------------|---------------------|---------------------|---------|------------------|
| C10:0            | 1.60 [0.63-2.82]    | 2.64 [1.79-3.77]    | 0.342   | 0.884            |
| C12:0            | 5.99 [4.50-10.14]   | 8.15 [6.40-11.45]   | 0.473   | 0.884            |
| C14:0            | 8.28 [7.32-11.73]   | 9.51 [8.50-11.62]   | 0.725   | 0.967            |
| C15:0            | 0.52 [0.44-0.54]    | 0.50 [0.47-0.52]    | 0.803   | 0.992            |
| C16:0            | 27.01 [26.76-27.54] | 26.81 [26.16-27.40] | 0.331   | 0.884            |
| C18:0            | 1.54 [1.20-1.61]    | 1.27 [1.21-1.39]    | 0.382   | 0.884            |
| C10:1            | 0.46 [0.20-0.65]    | 0.37 [0.32-0.73]    | 0.541   | 0.884            |
| C16:1 $\omega$ 7 | 9.34 [8.85-10.21]   | 9.66 [8.81-10.93]   | 0.843   | 0.992            |
| C18:1 $\omega$ 7 | 1.85 [1.48-2.08]    | 1.85 [1.61-2.16]    | 0.441   | 0.884            |
| C12:1            | 0.19 [0.16-0.29]    | 0.25 [0.20-0.33]    | 0.477   | 0.884            |
| C14:1 $\omega$ 5 | 0.62 [0.54-0.93]    | 0.72 [0.62-0.92]    | 1.000   | 1.000            |
| C15:1 $\omega$ 9 | 0.06 [0.05-0.08]    | 0.06 [0.05-0.09]    | 0.902   | 1.000            |
| C16:1 $\omega$ 9 | 0.86 [0.58-0.88]    | 0.68 [0.58-0.85]    | 0.581   | 0.884            |
| C18:1 $\omega$ 9 | 20.27 [15.15-21.26] | 18.00 [15.45-19.93] | 0.527   | 0.884            |
| C20:1 $\omega$ 9 | 0.22 [0.19-0.27]    | 0.18 [0.15-0.21]    | 0.048   | 0.884            |
| C18:3 $\omega$ 3 | 10.91 [10.60-11.63] | 10.95 [10.19-11.44] | 0.619   | 0.884            |
| C20:3 $\omega$ 3 | 0.25 [0.23-0.30]    | 0.21 [0.19-0.25]    | 0.098   | 0.884            |
| C20:5 $\omega$ 3 | 0.34 [0.21-0.47]    | 0.32 [0.24-0.40]    | 0.583   | 0.884            |
| C18:2 $\omega$ 6 | 7.77 [5.95-7.99]    | 6.70 [5.57-7.27]    | 0.349   | 0.884            |

|                                   |                     |                     |       |       |
|-----------------------------------|---------------------|---------------------|-------|-------|
| C20:4 $\omega$ 6                  | 0.04 [0.03-0.05]    | 0.04 [0.03-0.05]    | 1.000 | 1.000 |
| SFA                               | 45.21 [41.71-53.74] | 49.41 [46.32-54.30] | 0.533 | 0.623 |
| MUFA                              | 34.22 [28.94-35.58] | 32.28 [27.15-34.37] | 0.623 | 0.623 |
| PUFA                              | 19.33 [16.83-20.63] | 18.09 [17.30-18.75] | 0.510 | 0.623 |
| MC-SFA                            | 16.51 [12.82-26.01] | 20.78 [17.43-26.43] | 0.465 | 0.623 |
| LC-SFA (>C16)                     | 28.48 [28.11-29.14] | 28.36 [27.37-28.76] | 0.326 | 0.623 |
| MC-MUFA                           | 1.32 [1.04-2.12]    | 1.69 [1.25-1.74]    | 0.515 | 0.623 |
| LC-MUFA (>C16)                    | 33.35 [26.81-34.65] | 31.04 [25.63-33.23] | 0.623 | 0.623 |
| $\omega$ 3 PUFA                   | 11.50 [10.96-12.66] | 11.53 [10.77-12.02] | 0.555 | 0.623 |
| $\omega$ 6 PUFA                   | 7.82 [5.97-8.04]    | 6.74 [5.90-7.31]    | 0.411 | 0.623 |
| $\omega$ 3/ $\omega$ 6 PUFA ratio | 1.64 [1.54-1.83]    | 1.77 [1.50-1.98]    | 0.462 | 0.623 |

### C. At 90 days of lactation

| Fatty acid (%)                    | N group (n=10)          | O group (n=14)          | p-value      | Adjusted p-value |
|-----------------------------------|-------------------------|-------------------------|--------------|------------------|
| <b>C10:0</b>                      | <b>2.85 [1.81-3.21]</b> | <b>0.25 [0.10-0.39]</b> | <b>0.000</b> | <b>0.000</b>     |
| C12:0                             | 2.39 [1.22-3.38]        | 3.74 [2.66-5.41]        | 0.030        | 0.150            |
| C14:0                             | 8.67 [7.32-9.31]        | 8.71 [8.27-9.47]        | 0.201        | 0.502            |
| C15:0                             | 0.58 [0.54-0.62]        | 0.56 [0.51-0.62]        | 1.000        | 1.000            |
| C16:0                             | 30.01 [27.31-30.66]     | 27.47 [26.98-28.15]     | 0.040        | 0.150            |
| C18:0                             | 1.42 [1.23-1.47]        | 1.40 [1.18-2.06]        | 0.345        | 0.691            |
| C10:1                             | 0.19 [0.10-0.26]        | 0.37 [0.24-0.49]        | 0.015        | 0.100            |
| C16:1 $\omega$ 7                  | 11.7 [10.81-13.03]      | 11.9 [10.30-13.93]      | 0.980        | 1.000            |
| C18:1 $\omega$ 7                  | 2.18 [1.90-2.72]        | 2.14 [1.97-2.36]        | 0.784        | 0.923            |
| C12:1                             | 0.19 [0.15-0.27]        | 0.30 [0.27-0.36]        | 0.045        | 0.150            |
| C14:1 $\omega$ 5                  | 0.86 [0.78-1.04]        | 0.97 [0.82-1.16]        | 0.654        | 0.923            |
| C15:1 $\omega$ 9                  | 0.06 [0.05-0.07]        | 0.07 [0.05-0.08]        | 0.941        | 1.000            |
| C16:1 $\omega$ 9                  | 0.68 [0.50-0.90]        | 0.84 [0.68-0.88]        | 0.784        | 0.923            |
| C18:1 $\omega$ 9                  | 21.86 [20.19-23.21]     | 19.76 [18.79-21.68]     | 0.079        | 0.226            |
| C20:1 $\omega$ 9                  | 0.26 [0.22-0.38]        | 0.26 [0.21-0.30]        | 0.011        | 0.100            |
| C18:3 $\omega$ 3                  | 12.1 [9.74-13.03]       | 10.33 [9.10-11.38]      | 0.764        | 0.923            |
| C20:3 $\omega$ 3                  | 0.20 [0.17-0.27]        | 0.17 [0.12-0.20]        | 0.270        | 0.601            |
| C20:5 $\omega$ 3                  | 0.32 [0.28-0.42]        | 0.44 [0.30-0.59]        | 0.469        | 0.803            |
| C18:2 $\omega$ 6                  | 6.00 [5.34-6.97]        | 6.74 [5.65-7.41]        | 0.500        | 0.803            |
| C20:4 $\omega$ 6                  | 0.04 [0.03-0.05]        | 0.04 [0.03-0.09]        | 0.521        | 0.803            |
| SFA                               | 47.63 [45.44-49.93]     | 43.22 [41.80-45.50]     | 0.008        | 0.103            |
| MUFA                              | 37.64 [36.23-39.10]     | 37.30 [35.98-38.13]     | 0.385        | 0.660            |
| PUFA                              | 18.34 [16.18-20.60]     | 17.46 [16.58-19.67]     | 0.803        | 0.804            |
| MC-SFA                            | 18.08 [15.01-19.51]     | 14.29 [12.34-16.56]     | 0.030        | 0.184            |
| LC-SFA (>C16)                     | 31.26 [28.57-32.27]     | 28.95 [28.35-30.11]     | 0.294        | 0.624            |
| MC-MUFA                           | 1.32 [1.09-1.61]        | 1.89 [1.55-1.97]        | 0.079        | 0.304            |
| LC-MUFA (>C16)                    | 37.14 [35.24-38.00]     | 36.20 [34.25-36.64]     | 0.312        | 0.624            |
| $\omega$ 3 PUFA                   | 13.00 [10.24-13.72]     | 10.87 [9.71-12.86]      | 0.803        | 0.804            |
| $\omega$ 6 PUFA                   | 6.05 [5.38-7.00]        | 6.79 [5.70-7.47]        | 0.495        | 0.743            |
| $\omega$ 3/ $\omega$ 6 PUFA ratio | 1.87 [1.62-2.52]        | 1.67 [1.39-2.13]        | 0.654        | 0.804            |

**Figure S2: Fatty acid profile in milk at 30 days of lactation**

**Biplot of principal component analysis representing the first (46.4%) and second dimensions (12.1%).** Variables included in the analysis are represented by the black arrows. Supplementary variables are represented by the blue arrows. Milk samples from Normal mares are represented by the grey points and ellipse while milk samples from Obese mares are represented by the red points and ellipse. Ellipses represented are 95% confidence ellipses around the barycenter. SFA: saturated fatty acids, MC-SFA: medium-chain saturated fatty acids, LC-SFA: long-chain saturated fatty acids, MUFA: monounsaturated fatty acids, MC-MUFA: medium-chain monounsaturated fatty acids, LC-MUFA: long-chain monounsaturated fatty acids, PUFA: polyunsaturated fatty acids, w3: omega-3 fatty acids, w6: omega-6 fatty acids, w3.w6: omega-3/omega-6 fatty acids ratio.

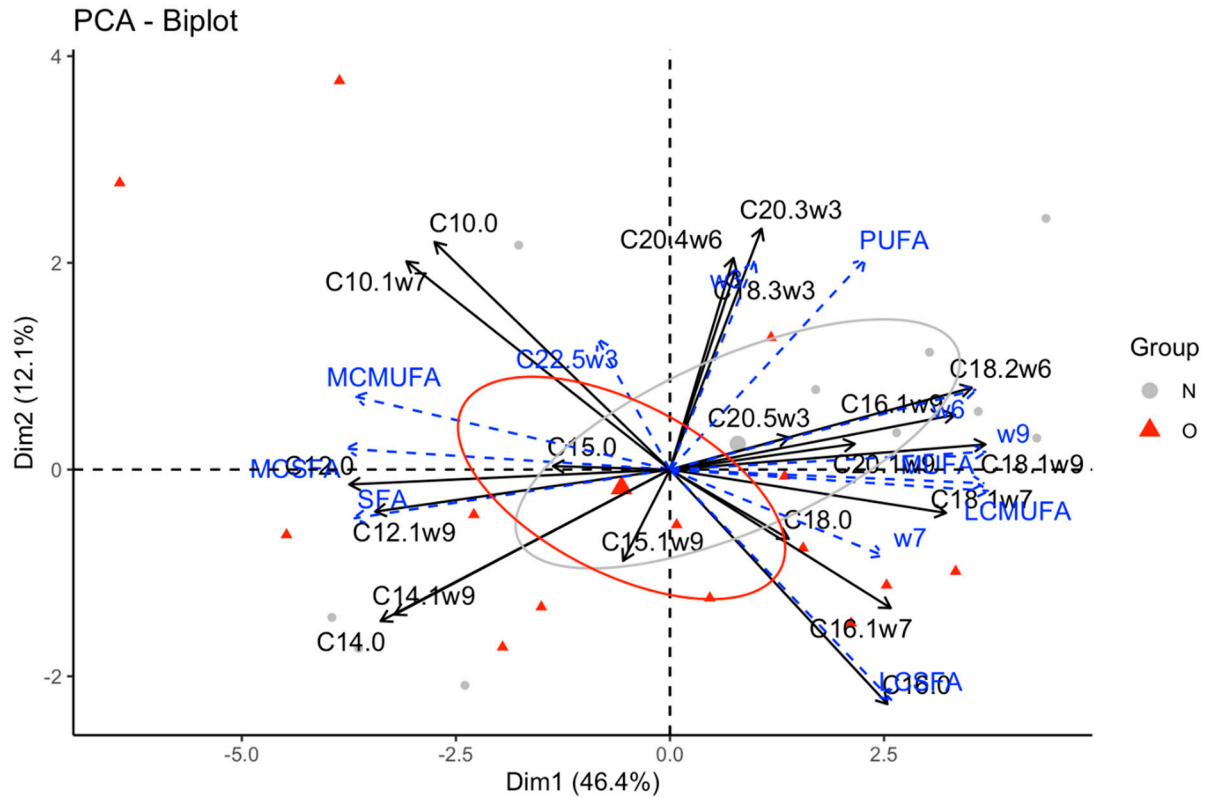

**Table S7: Fatty acid profile in plasma of foals during growth**

Results are expressed as median [Q1-Q3]. P-values were calculated using a permutation Anova (package lperm, function aovp, R software) considering sex of the foal as covariate. P-values were corrected for multiple testing using the fdr method. SFA: saturated fatty acids, MC-SFA: medium-chain saturated fatty acids, LC-SFA: long-chain saturated fatty acids, MUFA: monounsaturated fatty acids, MC-MUFA: medium-chain monounsaturated fatty acids, LC-MUFA: long-chain monounsaturated fatty acids, PUFA: polyunsaturated fatty acids.

**A. At birth**

| Fatty acid (%) | N group (n=10)   | O group (n=14)   | p-value | Adjusted p-value |
|----------------|------------------|------------------|---------|------------------|
| C10:0          | 0.13 [0.10-0.21] | 0.28 [0.24-0.39] | 0.052   | 0.148            |
| C12:0          | 0.52 [0.45-0.58] | 0.52 [0.36-0.75] | 1.000   | 1.000            |
| C14:0          | 1.84 [1.68-2.08] | 1.47 [1.42-1.56] | 0.027   | 0.136            |
| C15:0          | 0.23 [0.21-0.27] | 0.26 [0.24-0.30] | 0.123   | 0.246            |



|                                   |                     |                     |       |       |
|-----------------------------------|---------------------|---------------------|-------|-------|
| C16:0                             | 30.37 [29.02-30.71] | 30.59 [29.37-31.97] | 0.179 | 0.275 |
| C18:0                             | 9.83 [9.62-11.67]   | 11.53 [10.33-13.28] | 0.148 | 0.269 |
| C10:1                             | 0.65 [0.59-0.73]    | 0.63 [0.43-0.86]    | 1.000 | 1.000 |
| C16:1 $\omega$ 7                  | 7.75 [6.12-8.47]    | 6.80 [5.50-7.07]    | 0.068 | 0.171 |
| C18:1 $\omega$ 7                  | 2.42 [2.11-2.58]    | 2.64 [2.30-3.14]    | 0.046 | 0.148 |
| C12:1                             | 0.20 [0.18-0.23]    | 0.19 [0.17-0.20]    | 0.784 | 0.980 |
| C14:1 $\omega$ 5                  | 0.18 [0.11-0.20]    | 0.15 [0.12-0.18]    | 1.000 | 1.000 |
| C15:1 $\omega$ 9                  | 0.21 [0.18-0.27]    | 0.21 [0.18-0.25]    | 0.941 | 1.000 |
| C16:1 $\omega$ 9                  | 0.98 [0.84-1.15]    | 0.84 [0.80-0.92]    | 0.095 | 0.212 |
| C18:1 $\omega$ 9                  | 24.68 [23.45-27.09] | 24.21 [22.53-26.55] | 0.353 | 0.504 |
| C20:1 $\omega$ 9                  | 0.18 [0.15-0.20]    | 0.22 [0.21-0.24]    | 0.012 | 0.113 |
| C18:3 $\omega$ 3                  | 0.48 [0.43-0.59]    | 0.28 [0.25-0.39]    | 0.017 | 0.113 |
| C20:3 $\omega$ 3                  | 0.65 [0.61-0.72]    | 0.80 [0.76-0.84]    | 0.013 | 0.113 |
| C20:5 $\omega$ 3                  | 1.26 [1.18-1.36]    | 1.04 [0.85-1.13]    | 0.045 | 0.148 |
| C18:2 $\omega$ 6                  | 11.97 [11.04-13.44] | 13.20 [11.79-13.5]  | 0.169 | 0.275 |
| C20:4 $\omega$ 6                  | 1.54 [1.30-1.79]    | 1.55 [1.12-1.71]    | 0.660 | 0.881 |
| SFA                               | 43.43 [41.66-44.84] | 45.19 [45.00-47.02] | 0.008 | 0.032 |
| MUFA                              | 37.52 [33.84-40.33] | 35.53 [34.34-37.78] | 0.363 | 0.623 |
| PUFA                              | 27.08 [26.11-27.60] | 27.60 [26.79-27.89] | 0.433 | 0.649 |
| MC-SFA                            | 2.89 [2.60-3.02]    | 2.57 [2.42-2.98]    | 0.745 | 0.813 |
| LC-SFA (>C16)                     | 40.42 [38.76-42.34] | 42.37 [41.28-43.77] | 0.034 | 0.102 |
| MC-MUFA                           | 1.21 [1.14-1.36]    | 1.15 [0.97-1.22]    | 0.706 | 0.813 |
| LC-MUFA (>C16)                    | 35.73 [32.60-37.62] | 35.44 [34.28-36.44] | 0.603 | 0.804 |
| $\omega$ 3 PUFA                   | 1.77 [1.60-1.86]    | 1.30 [1.17-1.40]    | 0.002 | 0.010 |
| $\omega$ 6 PUFA                   | 13.55 [12.62-15.39] | 14.55 [13.61-14.82] | 0.273 | 0.623 |
| $\omega$ 3/ $\omega$ 6 PUFA ratio | 0.13 [0.12-0.14]    | 0.09 [0.08-0.10]    | 0.001 | 0.007 |

#### B. At 30 days of lactation

| Fatty acid (%)   | N group (n=10)      | O group (n=14)      | p-value | Adjusted p-value |
|------------------|---------------------|---------------------|---------|------------------|
| C10:0            | 0.17 [0.15-0.21]    | 0.13 [0.07-0.18]    | 0.057   | 0.114            |
| C12:0            | 0.65 [0.53-0.76]    | 0.33 [0.25-0.44]    | 0.011   | 0.042            |
| C14:0            | 3.03 [2.69-3.50]    | 2.26 [1.95-2.48]    | 0.000   | 0.000            |
| C15:0            | 0.39 [0.38-0.43]    | 0.40 [0.37-0.42]    | 0.941   | 0.991            |
| C16:0            | 24.14 [23.47-24.72] | 22.66 [22.37-23.01] | 0.000   | 0.001            |
| C18:0            | 14.55 [13.88-14.78] | 16.22 [14.92-16.62] | 0.027   | 0.076            |
| C10:1            | 0.54 [0.44-0.64]    | 0.22 [0.18-0.27]    | 0.022   | 0.073            |
| C16:1 $\omega$ 7 | 3.84 [3.71-4.11]    | 3.91 [3.69-4.37]    | 0.686   | 0.854            |
| C18:1 $\omega$ 7 | 1.72 [1.58-1.91]    | 1.86 [1.76-1.97]    | 0.093   | 0.169            |
| C12:1            | 0.17 [0.15-0.20]    | 0.13 [0.10-0.17]    | 0.000   | 0.001            |
| C14:1 $\omega$ 5 | 0.25 [0.19-0.26]    | 0.26 [0.22-0.28]    | 0.725   | 0.854            |
| C15:1 $\omega$ 9 | 0.34 [0.27-0.38]    | 0.40 [0.32-0.43]    | 0.824   | 0.915            |
| C16:1 $\omega$ 9 | 0.51 [0.47-0.59]    | 0.49 [0.47-0.54]    | 0.594   | 0.792            |
| C18:1 $\omega$ 9 | 10.71 [10.27-11.26] | 11.51 [10.91-11.96] | 0.034   | 0.079            |
| C20:1 $\omega$ 9 | 0.19 [0.15-0.21]    | 0.13 [0.12-0.15]    | 0.000   | 0.002            |
| C18:3 $\omega$ 3 | 2.81 [2.53-3.73]    | 3.32 [2.75-3.99]    | 1.000   | 1.000            |
| C20:3 $\omega$ 3 | 0.07 [0.06-0.09]    | 0.08 [0.07-0.10]    | 0.321   | 0.493            |
| C20:5 $\omega$ 3 | 0.67 [0.63-0.80]    | 0.71 [0.65-0.93]    | 0.176   | 0.294            |
| C18:2 $\omega$ 6 | 32.17 [31.39-33.08] | 32.72 [30.97-34.84] | 0.510   | 0.729            |
| C20:4 $\omega$ 6 | 0.57 [0.52-0.66]    | 0.66 [0.56-0.70]    | 0.036   | 0.079            |
| SFA              | 43.36 [42.27-44.04] | 41.74 [40.70-42.39] | 0.003   | 0.019            |
| MUFA             | 18.71 [17.99-19.60] | 18.90 [18.49-19.17] | 0.804   | 0.941            |
| PUFA             | 36.89 [36.09-37.19] | 37.64 [36.63-39.30] | 0.072   | 0.217            |
| MC-SFA           | 4.19 [3.75-4.79]    | 3.12 [2.76-3.52]    | 0.000   | 0.000            |
| LC-SFA (>C16)    | 38.88 [37.85-39.24] | 38.58 [37.70-39.22] | 0.745   | 0.941            |
| MC-MUFA          | 1.48 [1.24-1.65]    | 1.03 [0.88-1.11]    | 0.006   | 0.026            |

|                  |                     |                     |       |       |
|------------------|---------------------|---------------------|-------|-------|
| LC-MUFA (>C16)   | 17.49 [16.43-17.75] | 18.04 [17.24-18.49] | 0.103 | 0.247 |
| ω3 PUFA          | 3.62 [3.22-4.37]    | 4.39 [3.61-4.99]    | 0.922 | 0.941 |
| ω6 PUFA          | 32.76 [32.00-33.69] | 33.39 [31.50-35.57] | 0.495 | 0.831 |
| ω3/ω6 PUFA ratio | 0.11 [0.10-0.13]    | 0.13 [0.10-0.15]    | 0.941 | 0.941 |

### C. At 90 days of lactation

| Fatty acid (%)   | N group (n=10)      | O group (n=14)      | p-value | Adjusted p-value |
|------------------|---------------------|---------------------|---------|------------------|
| C10:0            | 0.15 [0.12-0.33]    | 0.14 [0.10-0.15]    | 0.101   | 0.144            |
| C12:0            | 1.05 [0.77-1.20]    | 0.56 [0.46-0.66]    | 0.000   | 0.000            |
| C14:0            | 3.36 [3.26-3.49]    | 2.36 [2.28-2.82]    | 0.000   | 0.000            |
| C15:0            | 0.54 [0.52-0.58]    | 0.47 [0.44-0.53]    | 0.021   | 0.049            |
| C16:0            | 21.82 [21.30-22.08] | 22.27 [21.51-22.38] | 0.088   | 0.144            |
| C18:0            | 14.10 [13.35-15.12] | 15.36 [14.96-16.17] | 0.009   | 0.025            |
| C10:1            | 0.48 [0.42-0.52]    | 0.26 [0.23-0.34]    | 0.001   | 0.004            |
| C16:1ω7          | 4.15 [3.96-4.79]    | 3.88 [3.76-4.05]    | 0.022   | 0.049            |
| C18:1ω7          | 1.58 [1.43-1.66]    | 1.85 [1.74-1.93]    | 0.000   | 0.000            |
| C12:1            | 0.19 [0.17-0.22]    | 0.16 [0.15-0.18]    | 0.462   | 0.543            |
| C14:1ω5          | 0.48 [0.46-0.54]    | 0.52 [0.43-0.57]    | 0.380   | 0.475            |
| C15:1ω9          | 0.49 [0.41-0.54]    | 0.35 [0.31-0.40]    | 0.001   | 0.003            |
| C16:1ω9          | 0.51 [0.46-0.59]    | 0.49 [0.46-0.53]    | 0.824   | 0.843            |
| C18:1ω9          | 9.78 [9.30-9.89]    | 10.21 [9.92-10.63]  | 0.122   | 0.163            |
| C20:1ω9          | 0.16 [0.14-0.23]    | 0.15 [0.14-0.19]    | 0.095   | 0.144            |
| C18:3ω3          | 3.94 [3.37-4.63]    | 3.45 [3.16-3.68]    | 0.007   | 0.023            |
| C20:3ω3          | 0.06 [0.05-0.09]    | 0.06 [0.05-0.08]    | 0.843   | 0.843            |
| C20:5ω3          | 2.12 [1.96-2.71]    | 1.96 [1.50-2.41]    | 0.094   | 0.144            |
| C18:2ω6          | 31.92 [31.23-32.93] | 33.37 [32.09-34.13] | 0.092   | 0.144            |
| C20:4ω6          | 0.69 [0.58-0.76]    | 0.66 [0.63-0.73]    | 0.824   | 0.843            |
| SFA              | 40.72 [39.95-41.31] | 41.56 [41.35-41.71] | 0.039   | 0.077            |
| MUFA             | 18.32 [16.96-18.99] | 17.60 [17.19-18.10] | 0.667   | 0.800            |
| PUFA             | 39.13 [37.75-39.77] | 38.96 [38.59-39.74] | 0.922   | 0.941            |
| MC-SFA           | 5.11 [4.76-5.44]    | 3.65 [3.41-4.10]    | 0.000   | 0.000            |
| LC-SFA (>C16)    | 35.55 [34.56-36.64] | 37.42 [37.24-38.16] | 0.000   | 0.000            |
| MC-MUFA          | 1.63 [1.43-1.87]    | 1.26 [1.19-1.31]    | 0.000   | 0.001            |
| LC-MUFA (>C16)   | 16.79 [15.95-17.15] | 16.56 [16.18-16.92] | 0.941   | 0.941            |
| ω3 PUFA          | 5.61 [5.17-6.64]    | 4.88 [4.67-5.07]    | 0.002   | 0.004            |
| ω6 PUFA          | 32.67 [31.85-33.68] | 34.00 [32.80-34.75] | 0.092   | 0.138            |
| ω3/ω6 PUFA ratio | 0.17 [0.15-0.21]    | 0.14 [0.13-0.15]    | 0.000   | 0.001            |
